# Supplementary material for: Type 2 Diabetes as a Determinant of Parkinson’s Disease Risk and Progression
Source: PubMed Central journal article supplement (PMC9017318; doi:10.1002/mds.28551), 2021-03-08

Supplementary table 1: Studies included in the T2DM-specific meta-analysis from the literature review.

| Study                          | Study Design | Ethnicity of participants | Follow-Up (years) | Average Age (years) | Sample Size                                           | Effect Estimate (95% Confidence Interval) | Quality Score | Confounding Factors                                                                                                                                                                        |
|--------------------------------|--------------|---------------------------|-------------------|---------------------|-------------------------------------------------------|-------------------------------------------|---------------|--------------------------------------------------------------------------------------------------------------------------------------------------------------------------------------------|
| Herishanu et al. 2001          | Case-Control | Middle-Eastern            | -                 | -                   | 93 case and 93 controls                               | 0.35 (0.15, 0.75)                         | Poor          | -                                                                                                                                                                                          |
| Powers et al. 2006             | Case-Control | Caucasian                 | -                 | 70                  | 352 cases and 484 controls                            | 0.62 (0.38, 1.01)                         | Fair          | Age, smoking, education and ethnicity.                                                                                                                                                     |
| Palacios et al. 2011           | Cohort       | Caucasian                 | 13                | 71.6                | 656                                                   | 0.88 (0.62, 1.25)                         | Good          | Age, smoking, education, BMI, physical activity, caloric intake, caffeine intake, pesticide, exposure, alcohol intake and diary intake.                                                    |
| Yang et al. 2017               | Cohort       | East-Asian                | 7.3               | 56                  | 36,294 (T2DM patients); 108,882 (non-T2DM patients)   | 1.19 (1.08, 1.32)                         | Good          | Age, gender, insurance premium, residential area, type of occupation, CCI scores, comorbidity of schizophrenia and bipolar disorder, flunarizine use, metoclopramide use and zolpidem use. |
| Jacobs et al. 2020             | Cohort       | Caucasian                 | 12                | 62.7                | 501,682                                               | 1.27 (1.03, 1.57)                         | Good          | Age, sex, townsend deprivation index at recruitment and ethnicity.                                                                                                                         |
| De Pablo-Fernandez et al. 2018 | Cohort       | Caucasian                 | -                 | 50                  | 2,017,115 (T2DM cohort); 7,173,208 (reference cohort) | 1.32 (1.29, 1.35)                         | Good          | Sex, calendar year of cohort entry, age, region of residence and quintile Index of Multiple Deprivation score of patients.                                                                 |
| Driver et al. 2008             | Cohort       | Caucasian                 | 23.1              | 73.1                | 21,841                                                | 1.34 (1.01, 1.77)                         | Good          | Age and smoking status.                                                                                                                                                                    |

|                   |        |           |    |      |        |                   |      |                                                                                                                                                                                            |
|-------------------|--------|-----------|----|------|--------|-------------------|------|--------------------------------------------------------------------------------------------------------------------------------------------------------------------------------------------|
| Xu et al.<br>2011 | Cohort | Caucasian | -  | 66.7 | 1,565  | 1.41 (1.2, 1.66)  | Fair | Baseline age, race, sex, smoking status, education, physical activity and BMI.                                                                                                             |
| Hu et al.<br>2007 | Cohort | Caucasian | 18 | 48.8 | 51,552 | 1.83 (1.21, 2.76) | Good | Age, sex, study year, BMI, systolic BP, cholesterol, education, alcohol consumption, tea consumption, coffee consumption, cigarette smoking, leisure-time physical activity and education. |

---

T2DM- type 2 diabetes mellitus, BMI- body mass index, BP- blood pressure, CCI- Charlson comorbidity index.

Supplementary table 2: Studies included in the any diabetes meta-analysis from the literature review.

| Study                    | Study Design | Ethnicity of participants | Follow-up (years) | Average Age | Sample Size                  | Effect Estimate (95% Confidence Interval) | Quality Score | Confounding Factors                                                                                                                                                                                          |
|--------------------------|--------------|---------------------------|-------------------|-------------|------------------------------|-------------------------------------------|---------------|--------------------------------------------------------------------------------------------------------------------------------------------------------------------------------------------------------------|
| Miyake et al. 2010       | Case-Control | East Asian                | -                 | 67.7        | 249 cases and 368 controls   | 0.38 (0.17, 0.79)                         | Poor          | Sex, age, region of residence, pack-years of smoking, years of education, leisure-time exercise, BMI, dietary intake of energy, cholesterol, vitamin E, alcohol, and coffee and the dietary glycaemic index. |
| D'Amelio et al. 2009     | Case-Control | Caucasian                 | -                 | 66.7        | 318 cases, 318 controls      | 0.4 (0.2, 0.8)                            | Good          | BMI, smoking habit, education and occupational status.                                                                                                                                                       |
| Kessler 1972             | Case-Control | Caucasian                 | -                 | 67.8        | 228 cases, 228 controls      | 0.58 (0.3, 1.1)                           | Poor          | Age                                                                                                                                                                                                          |
| Savica et al. 2012       | Case-Control | Caucasian                 | -                 | 71          | 202 cases, 202 controls      | 0.67 (0.31, 1.48)                         | Fair          | Age, sex, cigarette smoking and coffee consumption.                                                                                                                                                          |
| Rugbjerg et al. 2009     | Case-Control | Caucasian                 | -                 | 73          | 13,695 cases, 68445 controls | 1.10 (0.8, 1.5)                           | Fair          | Chronic obstructive pulmonary disease and sex.                                                                                                                                                               |
| Schernhammer et al. 2011 | Case-Control | Caucasian                 | -                 | 72.2        | 1,931 cases, 9,651 controls  | 1.35 (1.1, 1.65)                          | Fair          | Age, sex and chronic obstructive pulmonary disease.                                                                                                                                                          |
| Morano et al. 1994       | Case-Control | Caucasian                 | -                 | 68.2        | 74 cases and 148 controls    | 1.39 (0.63, 3.05)                         | Poor          | -                                                                                                                                                                                                            |

|                          |                 |            |      |      |                                                            |                   |      |                                                                                                                                                                                                                                                     |
|--------------------------|-----------------|------------|------|------|------------------------------------------------------------|-------------------|------|-----------------------------------------------------------------------------------------------------------------------------------------------------------------------------------------------------------------------------------------------------|
| Leibson et al. 2006      | Cohort          | Caucasian  | -    | 70   | 202 (PD patients), 202 (reference cohort)                  | 0.70 (0.4, 1.4)   | Poor | -                                                                                                                                                                                                                                                   |
| Simon et al. 2007        | Cohort          | Caucasian  | 22.9 | 66.6 | 171,879                                                    | 1.04 (0.74, 1.46) | Fair | Age and smoking status.                                                                                                                                                                                                                             |
| Grandinettei et al. 1994 | Cohort          | Caucasian  | 26   | 69.7 | 8,006                                                      | 1.20 (0.67, 2.12) | Poor | Age                                                                                                                                                                                                                                                 |
| Kim et al. 2018          | Cohort          | East Asian | 10   | 64.5 | 7,746                                                      | 1.26 (1.19, 1.33) | Poor | -                                                                                                                                                                                                                                                   |
| Sun et al. 2012          | Cohort          | East Asian | -    | -    | 603,416 (diabetic patients); 472,188 (non-diabetic cohort) | 1.61 (1.56, 1.66) | Good | Age, sex, geographic area, urbanisation status, hypertension, hyperlipidaemia and cardiovascular disease.                                                                                                                                           |
| Skeie et al. 2013        | Cohort          | Caucasian  | -    | 67.3 | 212 (PD cohort), 175 (control cohort)                      | 1.94 (0.82, 4.57) | Fair | Age                                                                                                                                                                                                                                                 |
| Becker et al. 2008       | Cross-Sectional | Caucasian  | -    | -    | 3,637 cases, 3,637 controls                                | 0.95 (0.8, 1.14)  | Good | BMI, smoking, asthma, dementia, hypertension, ischemic heart disease, congestive heart failure, stroke/transient ischemic attack, arrhythmia, hyperlipidaemia, epilepsy, affective disorders, schizophrenia, and neurotic and somatoform disorders. |

|                                |                 |           |   |    |                         |                  |      |                                                                                                                                                                                                        |
|--------------------------------|-----------------|-----------|---|----|-------------------------|------------------|------|--------------------------------------------------------------------------------------------------------------------------------------------------------------------------------------------------------|
| De Pablo-Fernandez et al. 2017 | Cross-Sectional | Caucasian | - | 73 | 79 cases, 4919 controls | 0.19 (0.9, 3.98) | Poor | Age, sex, hypertension, dyslipidaemia, antidiabetic treatment, alcohol consumption, smoking status, BMI, presence of cerebrovascular disease and treatment with potential parkinsonism-inducing drugs. |
|--------------------------------|-----------------|-----------|---|----|-------------------------|------------------|------|--------------------------------------------------------------------------------------------------------------------------------------------------------------------------------------------------------|

---

PD- Parkinson's disease, BMI- body mass index.

Supplementary table 3: Studies included in the progression meta-analysis from the literature review.

| Study              | Study Design    | Motor or Cognitive Progression | T2DM | Ethnicity of participants | Time Period (years) | Sample Size           | SMD (95% Confidence Interval)             | Quality Score | Confounding Factors                                          |
|--------------------|-----------------|--------------------------------|------|---------------------------|---------------------|-----------------------|-------------------------------------------|---------------|--------------------------------------------------------------|
| Cereda et al. 2012 | Case-Control    | Motor                          | Yes  | Caucasian                 | 3                   | 89 cases, 89 controls | 0.35 (0.06, 0.65)                         | Fair          | -                                                            |
| Malek et al. 2016  | Cohort          | Motor                          | No   | Caucasian                 | 3.5                 | 1,759                 | 0.62 (0.41, 0.83)                         | Good          | Age, gender, disease duration and all vascular risk factors. |
| Pagano et al. 2018 | Case-Control    | Motor<br>Cognitive             | Yes  | Caucasian                 | 3                   | 25 cases, 14 controls | 0.83 (0.21, 1.45)<br>-0.83 (-2.38, -0.08) | Good          | Sex, age, H&Y stage and MDS-UPDRS Part III score.            |
| Ong et al. 2017    | Cross-Sectional | Cognitive                      | No   | Caucasian                 | 3                   | 12 cases, 65 controls | -0.95 (-1.62, -0.27)                      | Fair          | -                                                            |

---

T2DM- type 2 diabetes mellitus; SMD- standardised mean difference, H&Y- Hoehn and Yahr, MDS-UPDRS- Movement Disorder Society- Unified Parkinson's Disease Rating Scale.

Supplementary table 4: Newcastle Ottawa Scale quality assessment of studies investigating the effect of T2DM on PD risk.

|                                | Selection                                                                                      |                                                                        |                                                                                                           |                                                                          | Comparability                                                                                                                                | Outcome                                                                                           |                                  |                                        | Quality Score |
|--------------------------------|------------------------------------------------------------------------------------------------|------------------------------------------------------------------------|-----------------------------------------------------------------------------------------------------------|--------------------------------------------------------------------------|----------------------------------------------------------------------------------------------------------------------------------------------|---------------------------------------------------------------------------------------------------|----------------------------------|----------------------------------------|---------------|
| Study                          | Representativeness of exposed cohort                                                           | Selection of the non-exposed cohort from same source as exposed cohort | Ascertainment of exposure                                                                                 | Demonstration that outcome of interest was not present at start of study | Comparability of cohorts on the basis of the design or analysis controlled for confounders                                                   | Assessment of outcome                                                                             | Sufficient follow-up             | Adequacy of follow up cohorts          |               |
| De Pablo-Fernandez et al. 2018 | Participants were truly representative of patients with T2DM and were excluded if they had PD. | Yes                                                                    | Secure record-ICD-10 code E11 (diagnosed with T2DM) from the English National Hospital Episode Statistics | Yes                                                                      | Sex, calendar year of cohort entry, age, region of residence, and quintile Index of Multiple Deprivation score of patients.                  | Record-linkage                                                                                    | Follow up not specified          | No statement                           | Good          |
| Hu et al. 2007                 | Participants were truly representative of patients with T2DM in Finland. 5 geographic areas of | Yes                                                                    | Self-report questionnaire                                                                                 | Yes                                                                      | Age, sex, study year, BMI, systolic BP, cholesterol, education, alcohol consumption, tea consumption, coffee consumption, cigarette smoking, | All patients diagnosed with PD according to the criteria set by the Institution, the diagnosis is | Yes- mean follow up of 18 years. | Complete follow-up of all the patients | Good          |

|                    |                                                                                                                                |     |                           |     |                                                                                |                                                                                                  |                     |                                        |      |
|--------------------|--------------------------------------------------------------------------------------------------------------------------------|-----|---------------------------|-----|--------------------------------------------------------------------------------|--------------------------------------------------------------------------------------------------|---------------------|----------------------------------------|------|
|                    | Finland were covered.                                                                                                          |     |                           |     | leisure-time physical activity and education.                                  | based on medical history, clinical examination . The diagnosis needs to be done by a consultant. |                     |                                        |      |
| Xu et al. 2011     | Participants were truly representative of patients with T2DM via the National Institutes of Health-AARP Diet and Healthy Study | Yes | Self-report               | Yes | Baseline age, race, sex, smoking status, education, physical activity and BMI. | Diagnosed by Doctor                                                                              | Not specified       | No statement                           | Fair |
| Driver et al. 2008 | Somewhat representative because females with PD were not included.                                                             | Yes | Self-report questionnaire | Yes | Age and smoking status                                                         | Self-report questionnaire                                                                        | Yes Mean-23.1 years | Complete follow-up of all the patients | Good |



|                       |                                                                                              |     |                                                               |     |                                                                                                                                       |                                                     |                         |                                        |      |
|-----------------------|----------------------------------------------------------------------------------------------|-----|---------------------------------------------------------------|-----|---------------------------------------------------------------------------------------------------------------------------------------|-----------------------------------------------------|-------------------------|----------------------------------------|------|
| Yang et al. 2017      | Participants were truly representative of patients with T2DM in Taiwan. Patients were found. | Yes | Taiwan's National Health Research Institutes Dataset          | Yes | Age and comorbidities                                                                                                                 | Record-linkage                                      | Yes<br>Mean-7.3 years   | Complete follow-up of all the patients | Good |
| Palacios et al. 2011  | Participants were somewhat representative of patients with T2DM.                             | Yes | Self-report                                                   | Yes | Age smoking, education, BMI, physical activity, caloric intake, caffeine intake, pesticide exposure, alcohol intake and diary intake. | Neurologists contacted and medical records checked. | Yes<br>Mean- 13 years   | No statement                           | Good |
| Powers et al. 2006    | Participants were truly representative of patients with PD.                                  | Yes | The Group Health Cooperative Health Maintenance Organisation. | Yes | Age, smoking, education and ethnicity                                                                                                 | Diagnosed by neurologists                           | Follow up not specified | No statement                           | Fair |
| Herishanu et al. 2001 | Participants were truly representative of patients with PD.                                  | Yes | Outpatient PD clinical of Soroka University Medical Centre.   | Yes | No description                                                                                                                        | No description                                      | Follow up not specified | No statement                           | Poor |

|                    |                                                             |     |                                                             |    |                                                                    |                |                    |                                        |      |
|--------------------|-------------------------------------------------------------|-----|-------------------------------------------------------------|----|--------------------------------------------------------------------|----------------|--------------------|----------------------------------------|------|
| Jacobs et al. 2020 | Participants were truly representative of patients with PD. | Yes | Linked Hospital Episode Statistics ICD codes or self-report | No | Age, sex, Townsend deprivation index at recruitment and ethnicity. | No description | Yes Mean- 12 years | Complete follow-up of all the patients | Good |
|--------------------|-------------------------------------------------------------|-----|-------------------------------------------------------------|----|--------------------------------------------------------------------|----------------|--------------------|----------------------------------------|------|

---

T2DM- type 2 diabetes mellitus, PD- Parkinson's disease; ICD-10- International Classification of Disease, Tenth Revision; BMI- body mass index; BP- blood pressure;

Supplementary table 5: Newcastle Ottawa Scale quality assessment of studies investigating the effect of any diabetes on PD risk.

|                     | Selection                                                            |                                                                        |                           |                                                                          | Comparability                                                                                                                                                                                            | Outcome                      |                                                 |                               | Quality Score |
|---------------------|----------------------------------------------------------------------|------------------------------------------------------------------------|---------------------------|--------------------------------------------------------------------------|----------------------------------------------------------------------------------------------------------------------------------------------------------------------------------------------------------|------------------------------|-------------------------------------------------|-------------------------------|---------------|
| Study               | Representativeness of exposed cohort                                 | Selection of the non-exposed cohort from same source as exposed cohort | Ascertainment of exposure | Demonstration that outcome of interest was not present at start of study | Comparability of cohorts on the basis of the design or analysis controlled for confounders                                                                                                               | Assessment of outcome        | Was follow-up long enough for outcomes to occur | Adequacy of follow up cohorts |               |
| Miyake et al. 2010  | Participants were truly representative of patients with DM in Japan. | Yes                                                                    | Hospital                  | Yes                                                                      | Sex, age, region of residence, pack-years of smoking, years of education, leisure-time exercise, BMI, dietary intake of energy, cholesterol, vitamin E, alcohol, coffee and the dietary glycaemic index. | Self-reporting Questionnaire | Follow up not specified                         | No statement                  | Poor          |
| Leibson et al. 2006 | Participants were truly representative of patients with PD.          | Yes                                                                    | Census                    | No                                                                       | Not specified                                                                                                                                                                                            | No description               | Not specified                                   | Not specified                 | Poor          |

|                           |                                                                       |     |                                   |     |                                                    |                      |               |                |      |
|---------------------------|-----------------------------------------------------------------------|-----|-----------------------------------|-----|----------------------------------------------------|----------------------|---------------|----------------|------|
| Skeie et al. 2013         | Participants were truly representative of patients with PD.           | Yes | Norwegian PakWest study           | Yes | Age                                                | Structured interview | Not specified | Not specified  | Fair |
| Morano et al. 1994        | Participants are somewhat of patients with PD.                        | Yes | Hospitals                         | No  | Not specified                                      | Not specified        | Not specified | Not specified  | Poor |
| Savica et al. 2012        | Participants were truly representative of patients with PD            | No  | Rochester Epidemiology Project    | Yes | Age, sex, cigarette smoking and coffee consumption | Record-linkage       | Not specified | Not specified  | Fair |
| Rugbjerg et al. 2009      | Participants were truly representative of patients with PD in Denmark | No  | Danish National Hospital Register | Yes | Chronic obstructive pulmonary disease and sex      | Hospital register    | Not specified | Not specified  | Fair |
| Kessler 1972              | Participants were truly representative of patients with PD            | Yes | Commercial sources                | No  | Age                                                | Structured interview | Not specified | Note specified | Poor |
| Grandine ttei et al. 1994 | Participants were somewhat of patients with PD                        | No  | Medical records                   | No  | Age                                                | Not specified        | Yes- 26 years | Not specified  | Poor |

|                                |                                                                           |     |                                    |     |                                                                                                                                                                                                        |                          |                 |               |      |
|--------------------------------|---------------------------------------------------------------------------|-----|------------------------------------|-----|--------------------------------------------------------------------------------------------------------------------------------------------------------------------------------------------------------|--------------------------|-----------------|---------------|------|
| Kim et al. 2018                | Participants were truly representative of patients with PD in South Korea | Yes | National Health Insurance Database | No  | Not specified                                                                                                                                                                                          | Health insurance claims  | Yes- 10 years   | Not specified | Poor |
| Schernhammer et al. 2011       | Participants were truly representative of patients with PD                | No  | Danish Hospital Register           | Yes | Age, sex and chronic obstructive pulmonary disease                                                                                                                                                     | Danish Hospital Register | Not specified   | Not specified | Fair |
| De Pablo-Fernandez et al. 2017 | Participants were truly representative of patients with PD                | Yes | NEDICES study                      | Yes | Age, sex, hypertension, dyslipidaemia, antidiabetic treatment, alcohol consumption, smoking status, BMI, presence of cerebrovascular disease and treatment with potential parkinsonism-inducing drugs. | Self-report              | Not specified   | Not specified | Poor |
| Simon et al. 2007              | Participants were somewhat representative of patients with PD             | No  | Nurses' Health Study               | No  | Age and smoking status                                                                                                                                                                                 | Self-reported history    | Yes- 22.9 years | Not specified | Fair |

|                      |                                                                     |     |                                              |     |                                                                                                                                                                                                                                                          |                               |               |                                                                                 |      |
|----------------------|---------------------------------------------------------------------|-----|----------------------------------------------|-----|----------------------------------------------------------------------------------------------------------------------------------------------------------------------------------------------------------------------------------------------------------|-------------------------------|---------------|---------------------------------------------------------------------------------|------|
| Becker at al., 2008  | Participants were truly representative of patients with PD          | Yes | UK- based General Practice Research Database | Yes | BMI, smoking, asthma/COPD, dementia, hypertension, ischemic heart disease, congestive heart failure, stroke/transient ischemic attack, arrhythmia, hyperlipidaemia, epilepsy, affective disorders, schizophrenia, and neurotic and somatoform disorders. | Patient records               | Not specified | Not specified                                                                   | Good |
| D'Amelio et al. 2009 | Participants were truly representative of patients with PD in Italy | Yes | Neurological Department of Palermo           | No  | BMI, smoking habit, education and occupational status                                                                                                                                                                                                    | Semi-structured questionnaire | Not specified | Subjects lost to follow up unlikely to introduce bias-number lost less than 20% | Good |

|                 |                                                                      |     |                          |     |                                                                                                           |                  |             |               |      |
|-----------------|----------------------------------------------------------------------|-----|--------------------------|-----|-----------------------------------------------------------------------------------------------------------|------------------|-------------|---------------|------|
| Sun et al. 2012 | Participants were truly representative of patients with DM in Taiwan | Yes | NHI claim data of Taiwan | Yes | Age, sex, geographic area, urbanisation status, hypertension, hyperlipidaemia and cardiovascular disease. | Hospital records | Yes- 1 year | Not specified | Good |
|-----------------|----------------------------------------------------------------------|-----|--------------------------|-----|-----------------------------------------------------------------------------------------------------------|------------------|-------------|---------------|------|

---

PD- Parkinson's disease; T2DM- type 2 diabetes mellitus; BMI- body mass index; COPD- chronic obstructive pulmonary disease; DM- disease mellitus.

Supplementary table 6: Newcastle Ottawa Scale quality assessment of studies investigating the effect of diabetes on PD progression.

| Study              | Selection                                                            |                                                                        |                                           |                                                                          | Comparability             | Outcome               |                      |                                                                                 | Quality Score |
|--------------------|----------------------------------------------------------------------|------------------------------------------------------------------------|-------------------------------------------|--------------------------------------------------------------------------|---------------------------|-----------------------|----------------------|---------------------------------------------------------------------------------|---------------|
|                    | Representativeness of exposed cohort                                 | Selection of the non-exposed cohort from same source as exposed cohort | Ascertainment of exposure                 | Demonstration that outcome of interest was not present at start of study |                           | Assessment of outcome | Sufficient follow-up | Adequacy of follow up cohorts                                                   |               |
| Cereda et al. 2012 | Participants were truly representative of patients with PD and T2DM. | Yes                                                                    | The Parkinson Institute research database | Yes                                                                      | No description            | UPDRS scale           | Yes-mean 3 years.    | Subjects lost to follow up unlikely to introduce bias-number lost less than 20% | Fair          |
| Malek et al. 2016  | Participants were truly representative of patients with PD and T2DM. | Yes                                                                    | Tracking Parkinson's study                | Yes                                                                      | All vascular risk factors | UPDRS scale           | Yes-mean 2.6 years.  | Subjects lost to follow up unlikely to introduce bias-number lost less than 20% | Good          |



|                    |                                                                      |     |                                                     |     |                                                  |                      |                |              |                   |
|--------------------|----------------------------------------------------------------------|-----|-----------------------------------------------------|-----|--------------------------------------------------|----------------------|----------------|--------------|-------------------|
| Pagano et al. 2018 | Participants were truly representative of patients with PD and T2DM. | Yes | Parkinson's Progression Markers Initiative database | Yes | Sex, age, H&Y stage and MDS-UPDRS Part III score | UPDRS scale and MoCA | Yes- 3 years.  | No statement | Good              |
| Ong et al. 2017    | Participants were truly representative of patients with PD and T2DM. | Yes | No description                                      | Yes | No description                                   | MoCA                 | Yes- 36 months | No statement | Fair <sup>1</sup> |

---

UPDRS- Unified Parkinson's Rating Scale; MoCA- Montreal Cognitive Assessment

Supplementary table 7: MR analysis between exposure (T2DM) and outcomes (PD-risk and progression).

| Outcome                          | Heterogeneity tests |         |        |                           |      |        | Test for directional horizontal pleiotropy |       |         |
|----------------------------------|---------------------|---------|--------|---------------------------|------|--------|--------------------------------------------|-------|---------|
|                                  | MR Egger            |         |        | Inverse variance weighted |      |        | Egger_intercept                            | SE    | p-value |
|                                  | Q                   | Q_df    | Q_pval | Q                         | Q_df | Q_pval |                                            |       |         |
| PD risk                          | 126.369             | 183.000 | 1.00   | 126.73                    | 184  | 1.00   | 0.002                                      | 0.004 | 0.550   |
| Continuous PD progression traits |                     |         |        |                           |      |        |                                            |       |         |
| UPDRS3                           | 140.270             | 156     | 0.81   | 140.29                    | 157  | 0.83   | 0.001                                      | 0.005 | 0.885   |
| MMSE                             | 135.158             | 159     | 0.92   | 138.10                    | 160  | 0.89   | -0.015                                     | 0.009 | 0.088   |
| MoCA                             | 124.287             | 112     | 0.20   | 126.13                    | 113  | 0.19   | 0.045                                      | 0.035 | 0.200   |

---

PD- Parkinson's disease; SE- standard error; UPDRS3- Unified Parkinson's Disease Rating Scale Part 3; MMSE- Mini Mental State Examination; MoCA- Montreal Cognitive Assessment.

Supplementary Figure 1: Funnel plot generated for T2DM-specific studies.

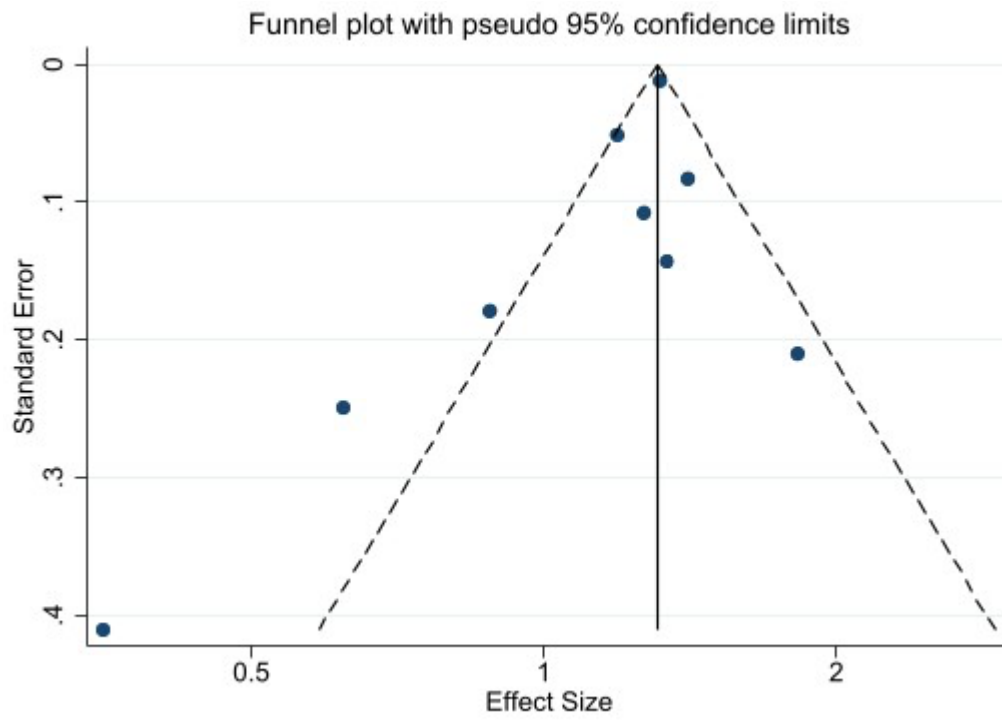

Supplementary Figure 2: PD risk decreases as average age of participants increases in T2DM-specific cohort studies.

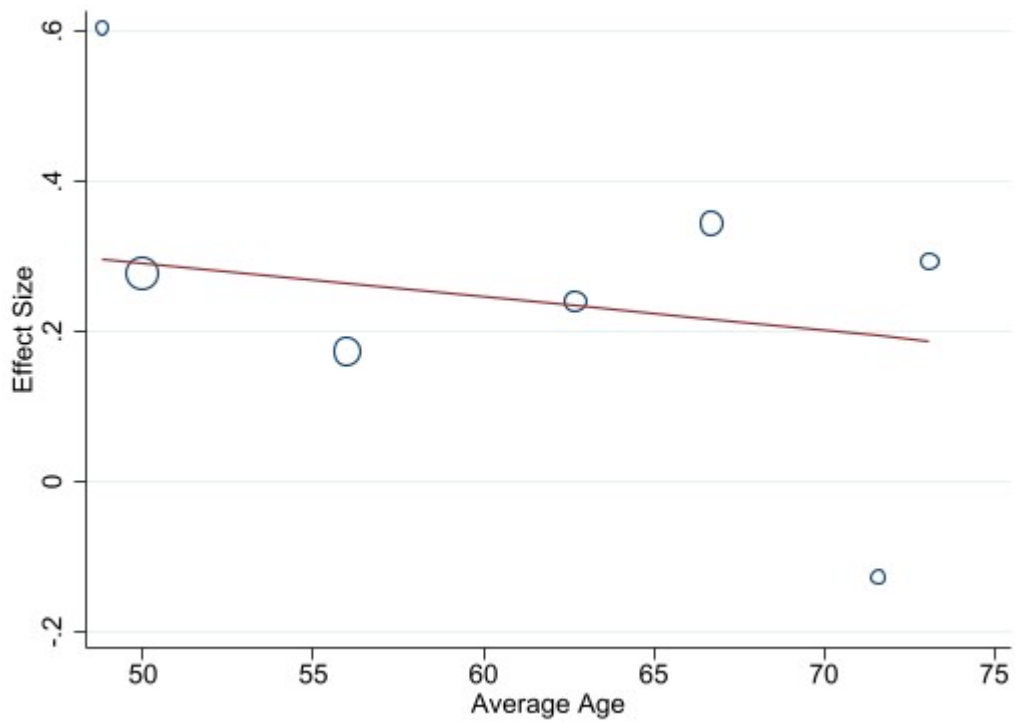

Supplementary figure 3: An observed exposure (T2DM) increases the risk of PD.

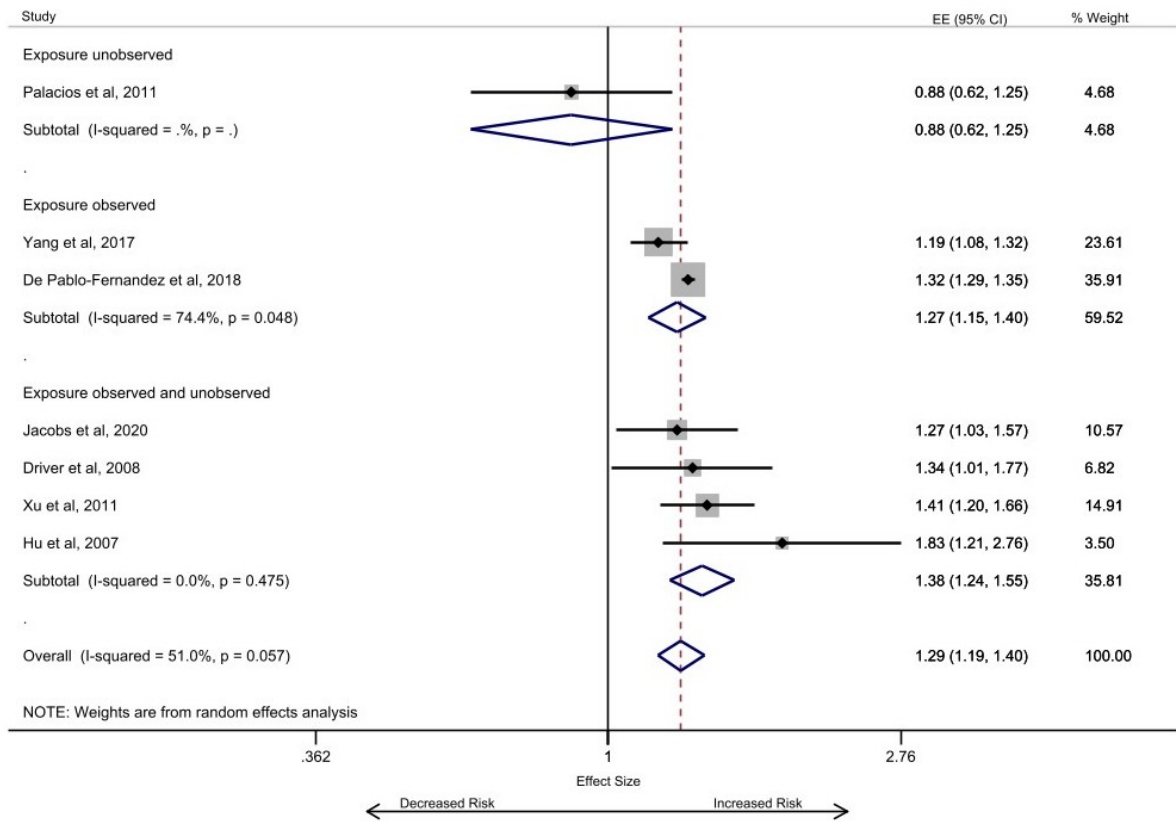

EE- effect estimate; CI- confidence interval.

Supplementary figure 4: Excluding patients with CVD further suggests T2DM is associated with an increased risk of PD.

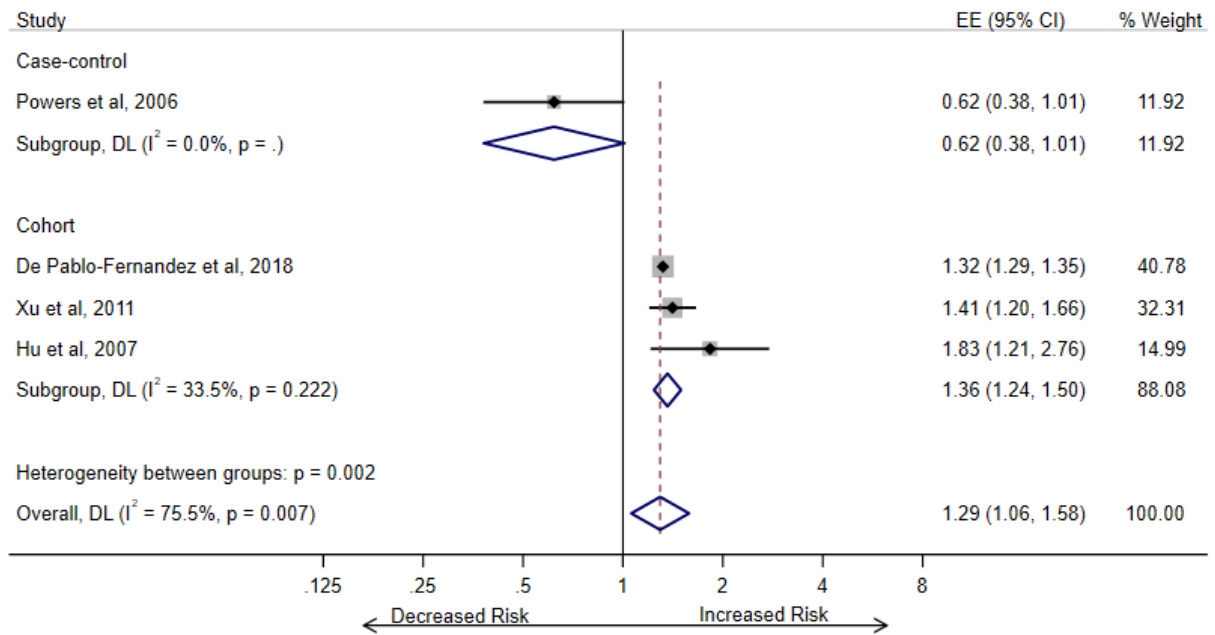

EE- effect estimate; CI- confidence interval.

Supplementary figure 5: Diabetes slightly increases the risk of Parkinson's disease (any diabetes).

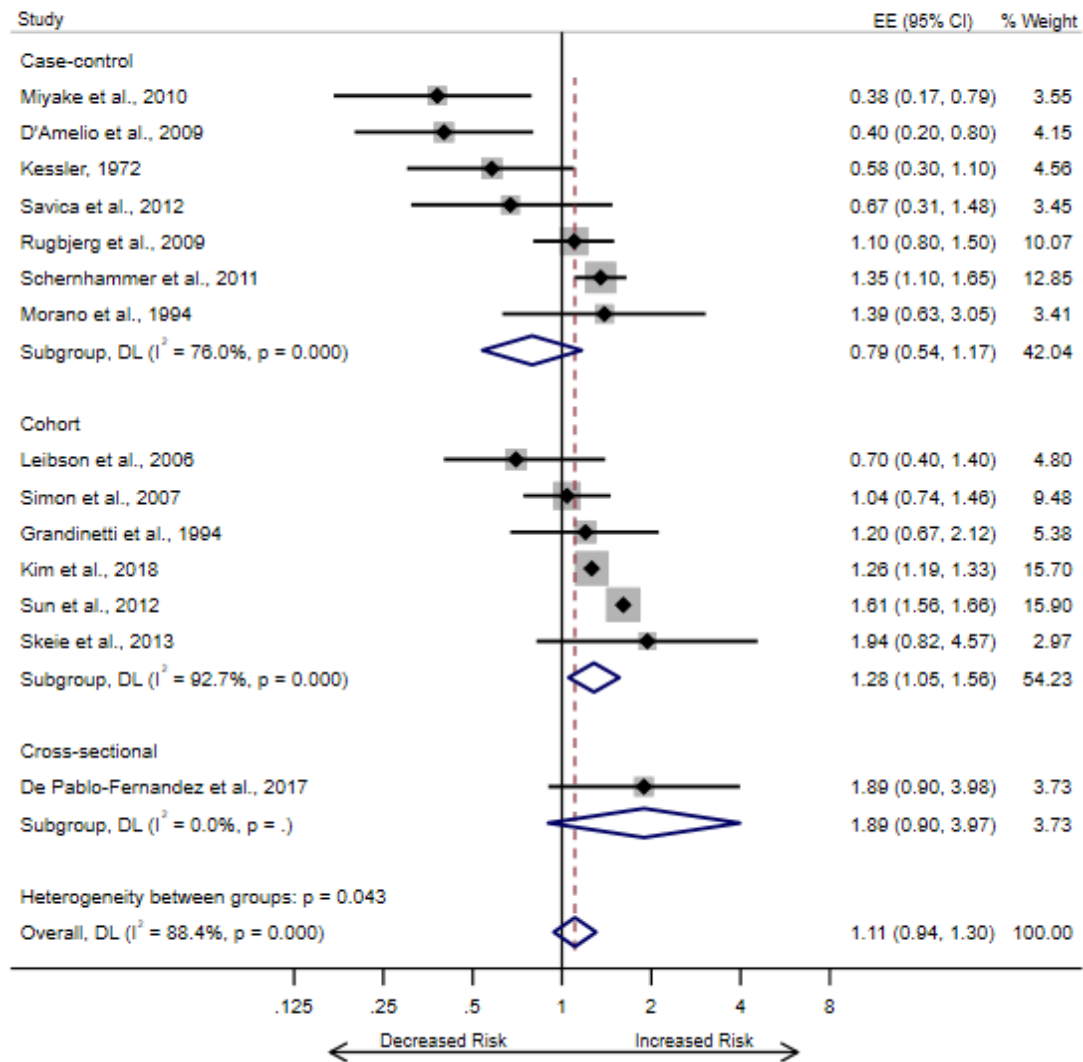

EE- effect estimate; CI- confidence interval.

Supplementary figure 6: Asymmetric funnel plot providing evidence for publication bias (any diabetes)

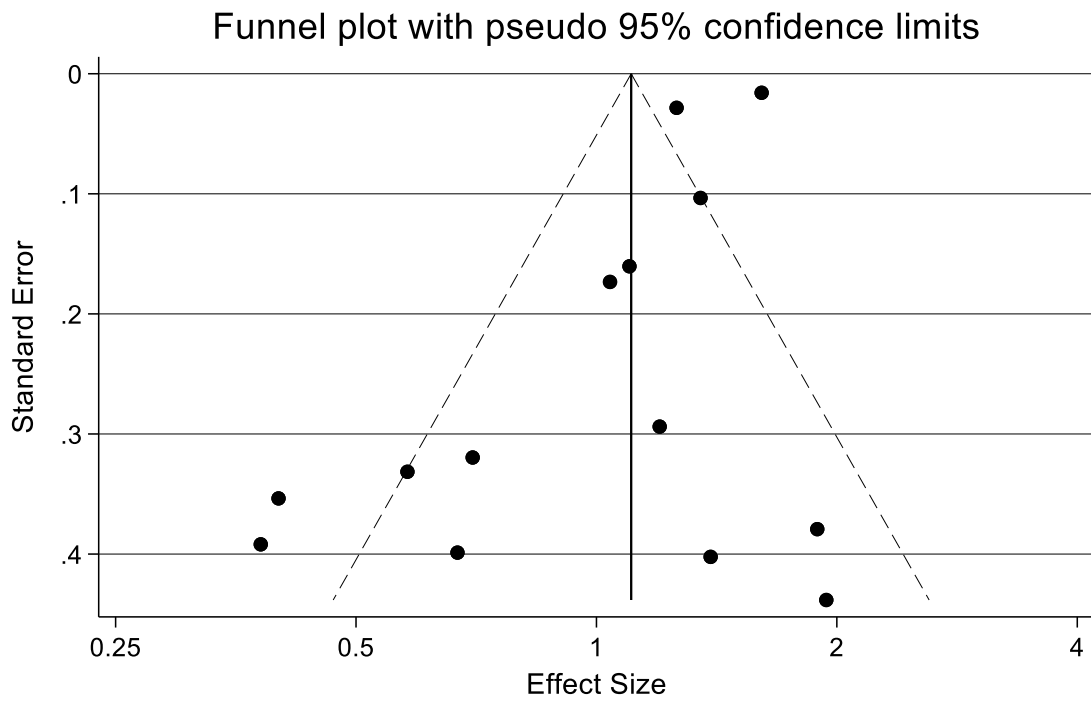



Supplementary figure 7: Funnel plot generated after trim and fill analysis to account for publication bias. Three studies were imputed.

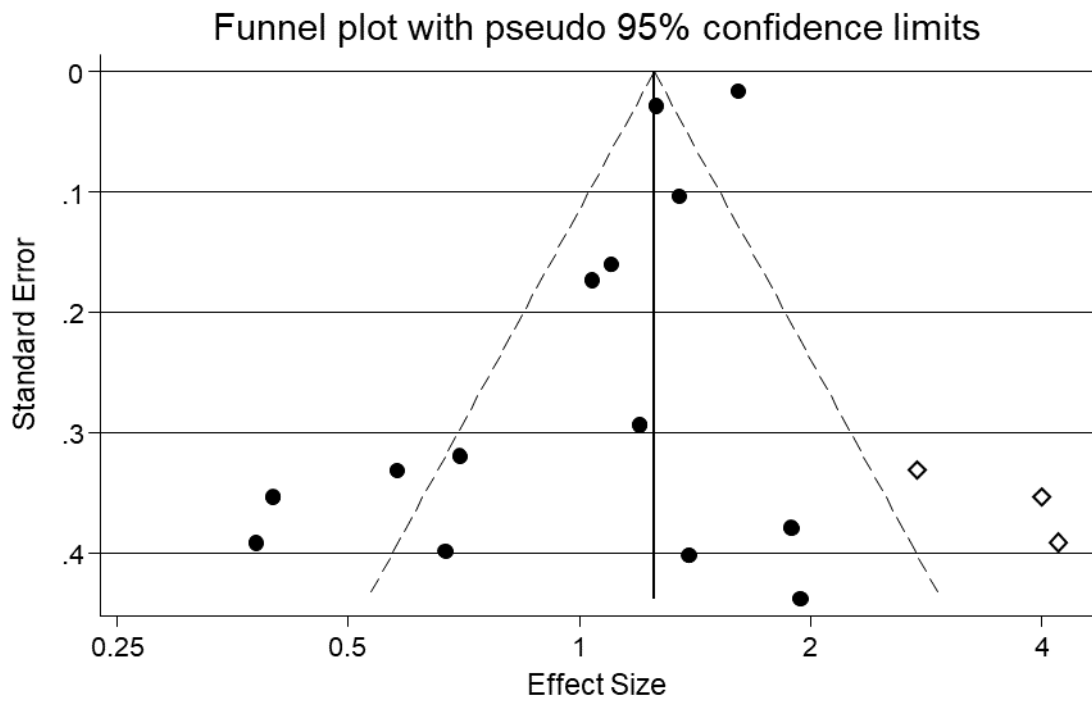

Supplementary figure 8: PD risk increases as average age of participants increases in case-control studies (any diabetes).

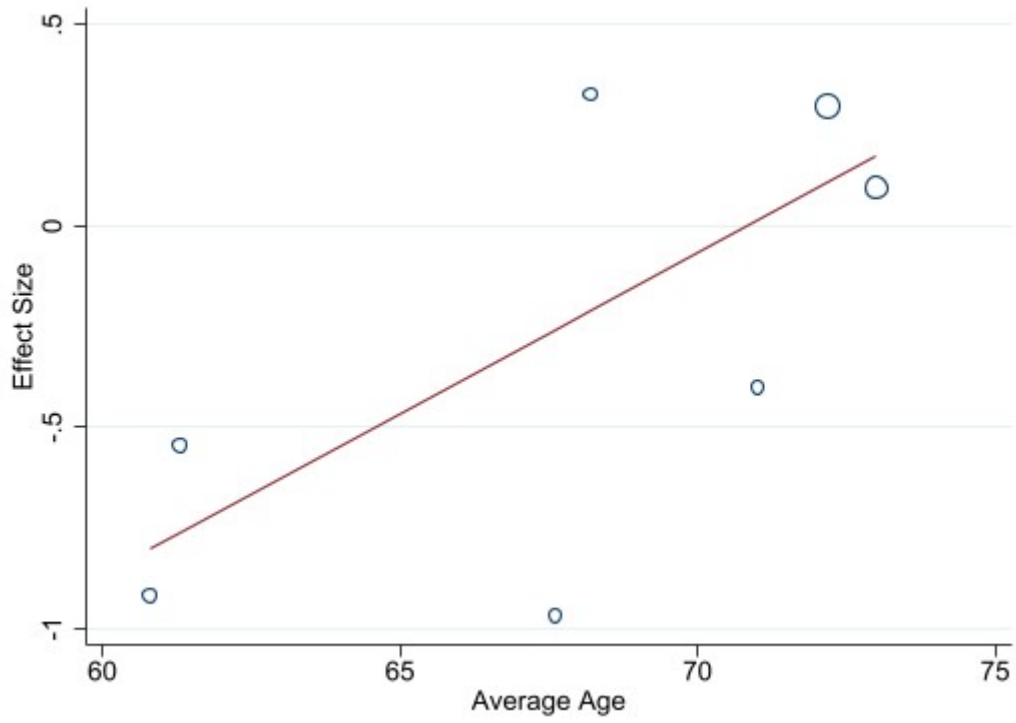

Supplementary figure 9: PD risk decreases as the average age of participants increases in cohort studies (any diabetes).

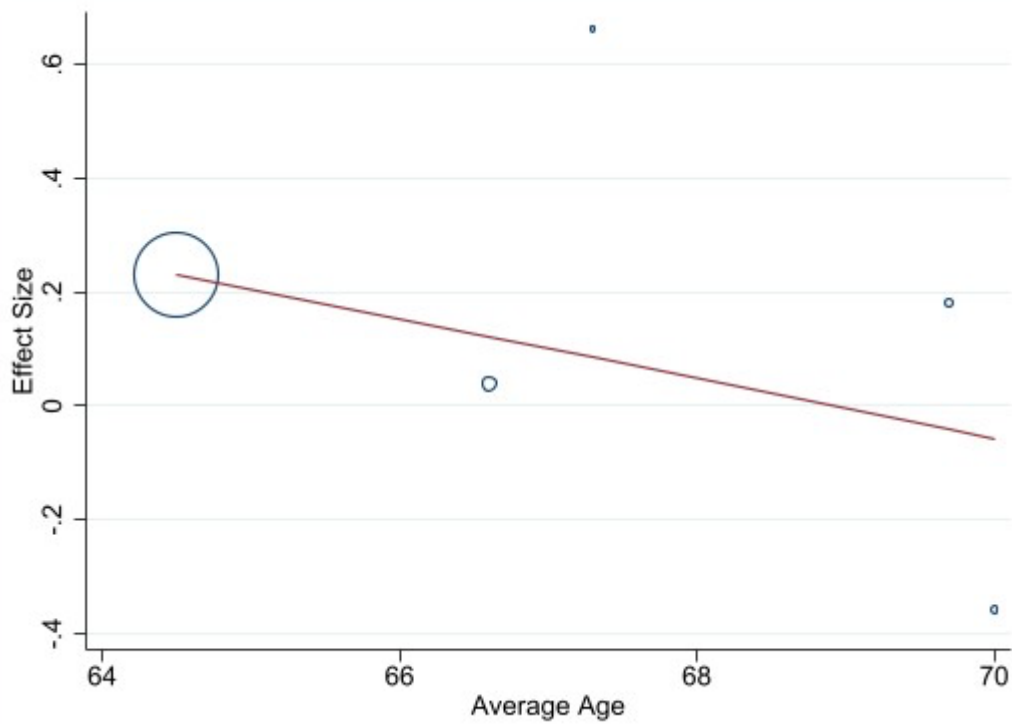

Supplementary figure 10: In the pooled case-control studies, as the average age of the participants increases the PD risk increases (T2DM-specific and any diabetes studies).

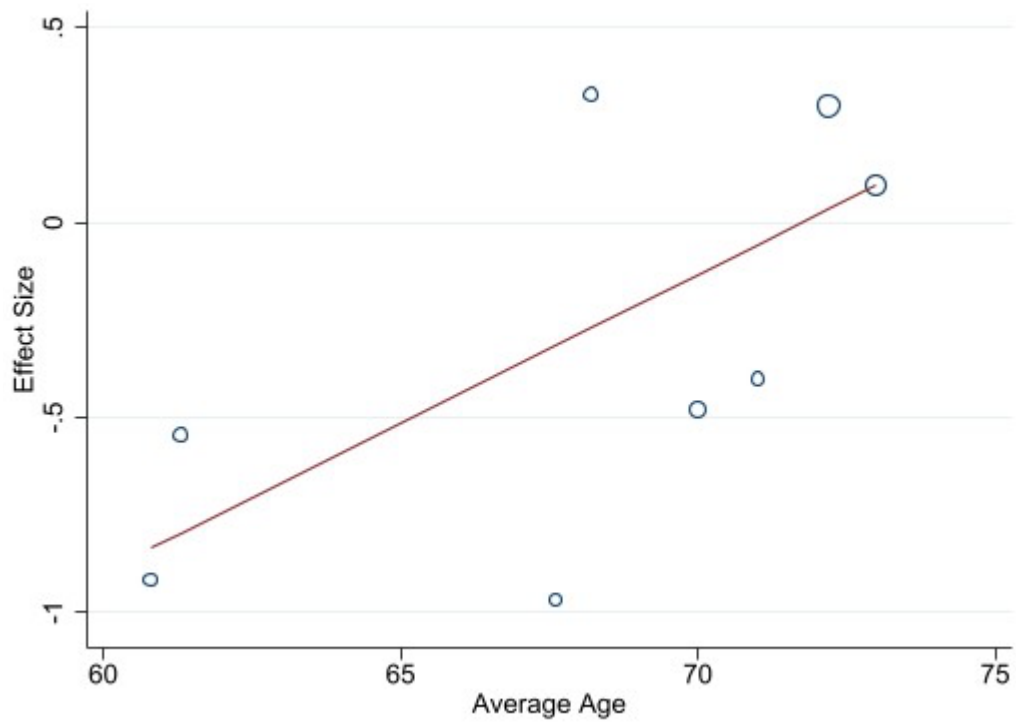

Supplementary Figure 11: Forest plots showing point estimates of the exposures of interest; Diabetes as exposure. PD risk and progression as outcomes.

### PD risk as outcome

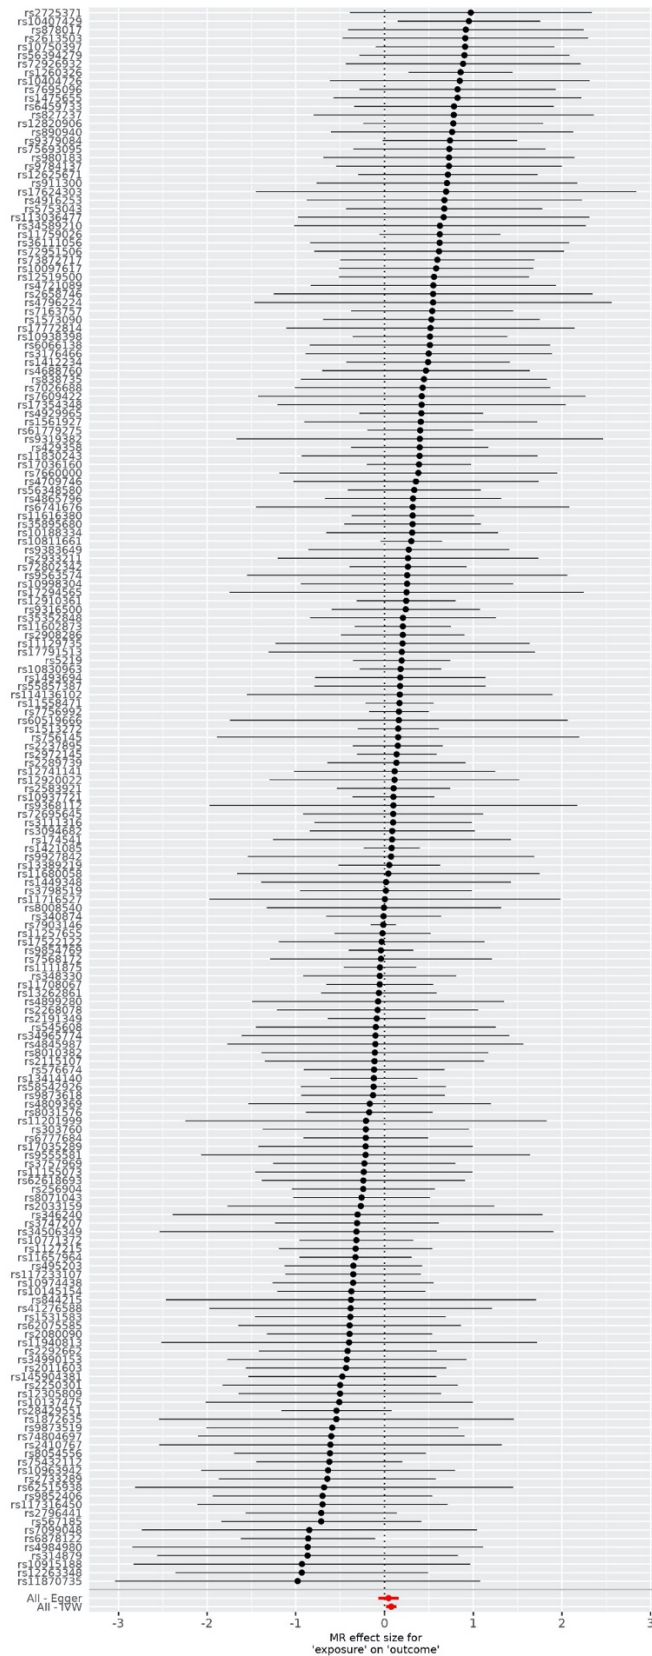

# MMSE in PD as outcome

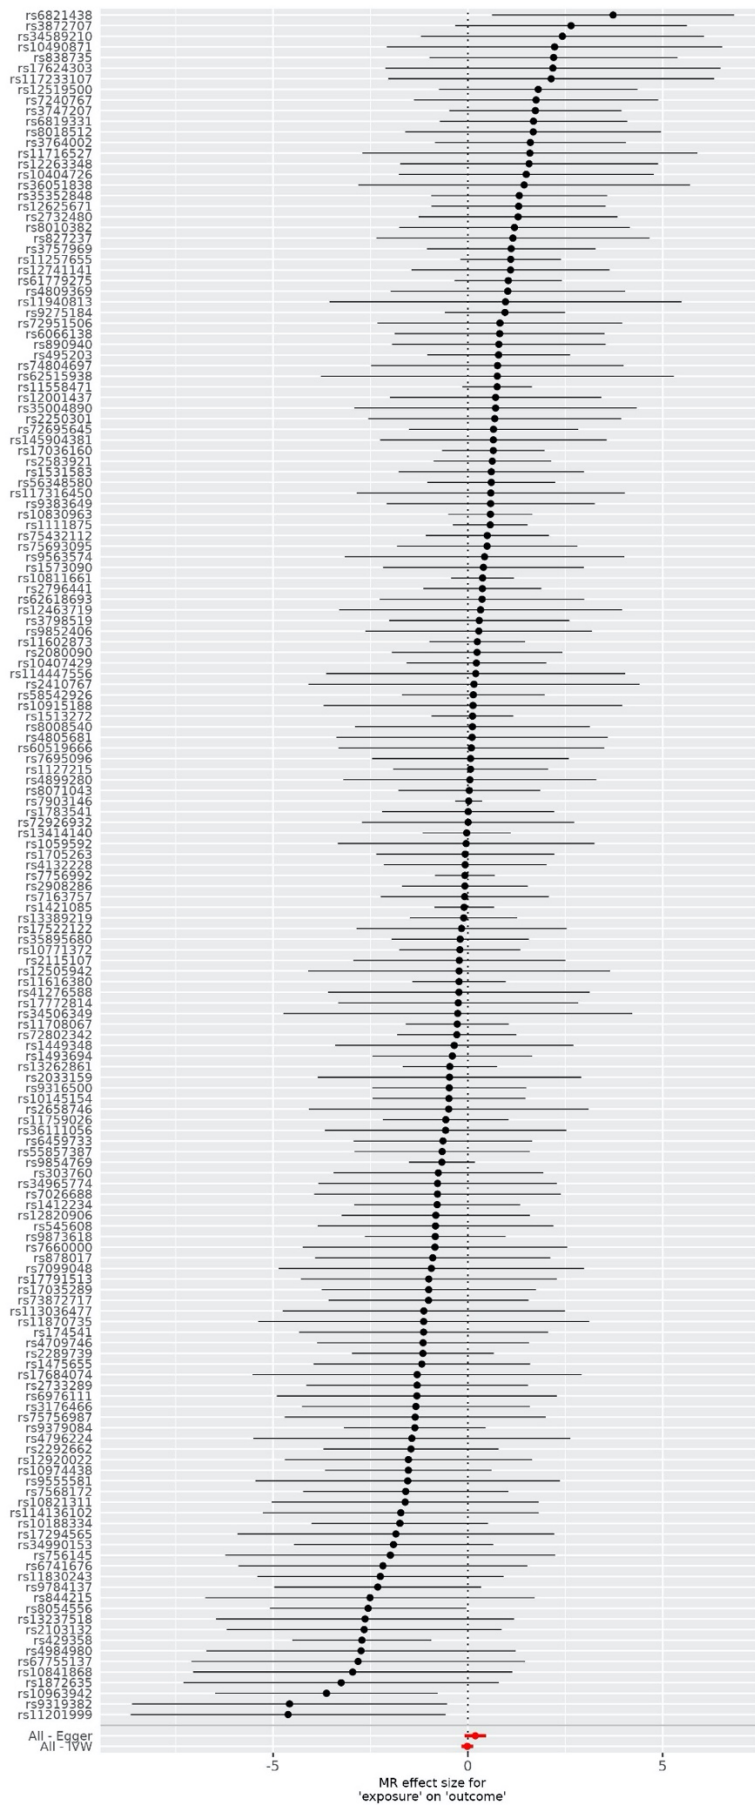

# MoCA in PD as outcome

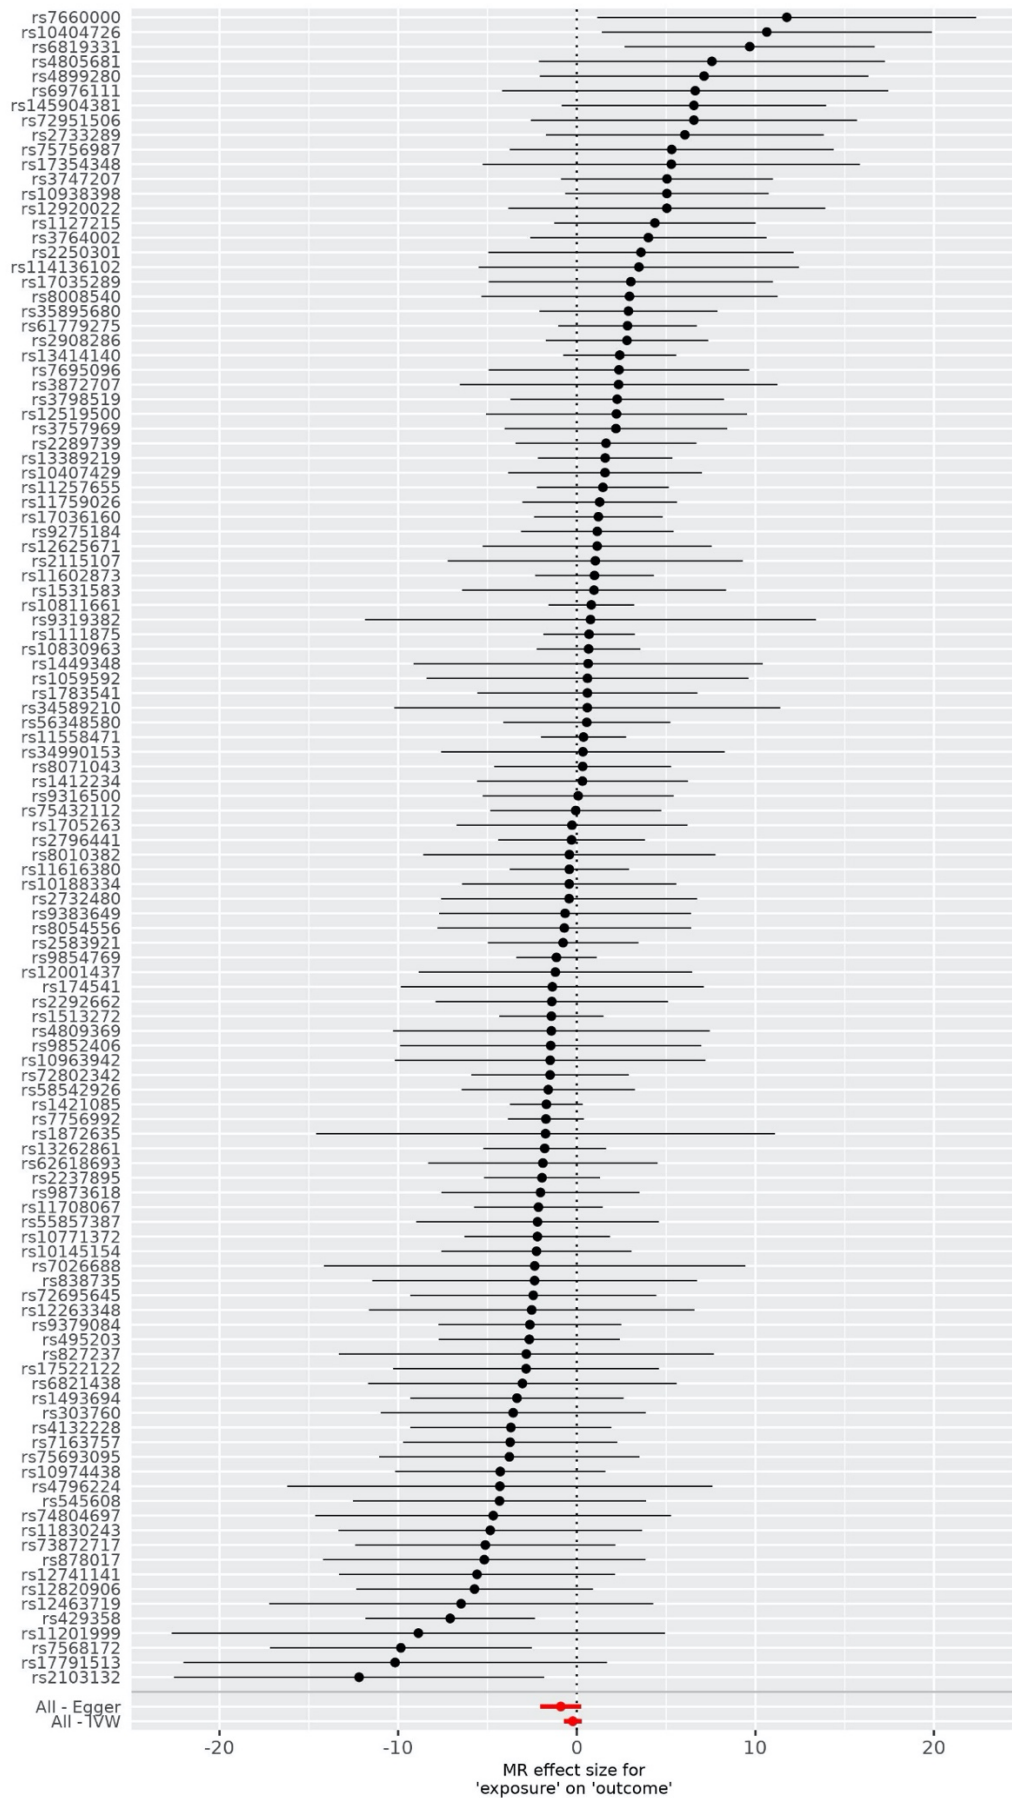

# UPDRS3 in PD as outcome

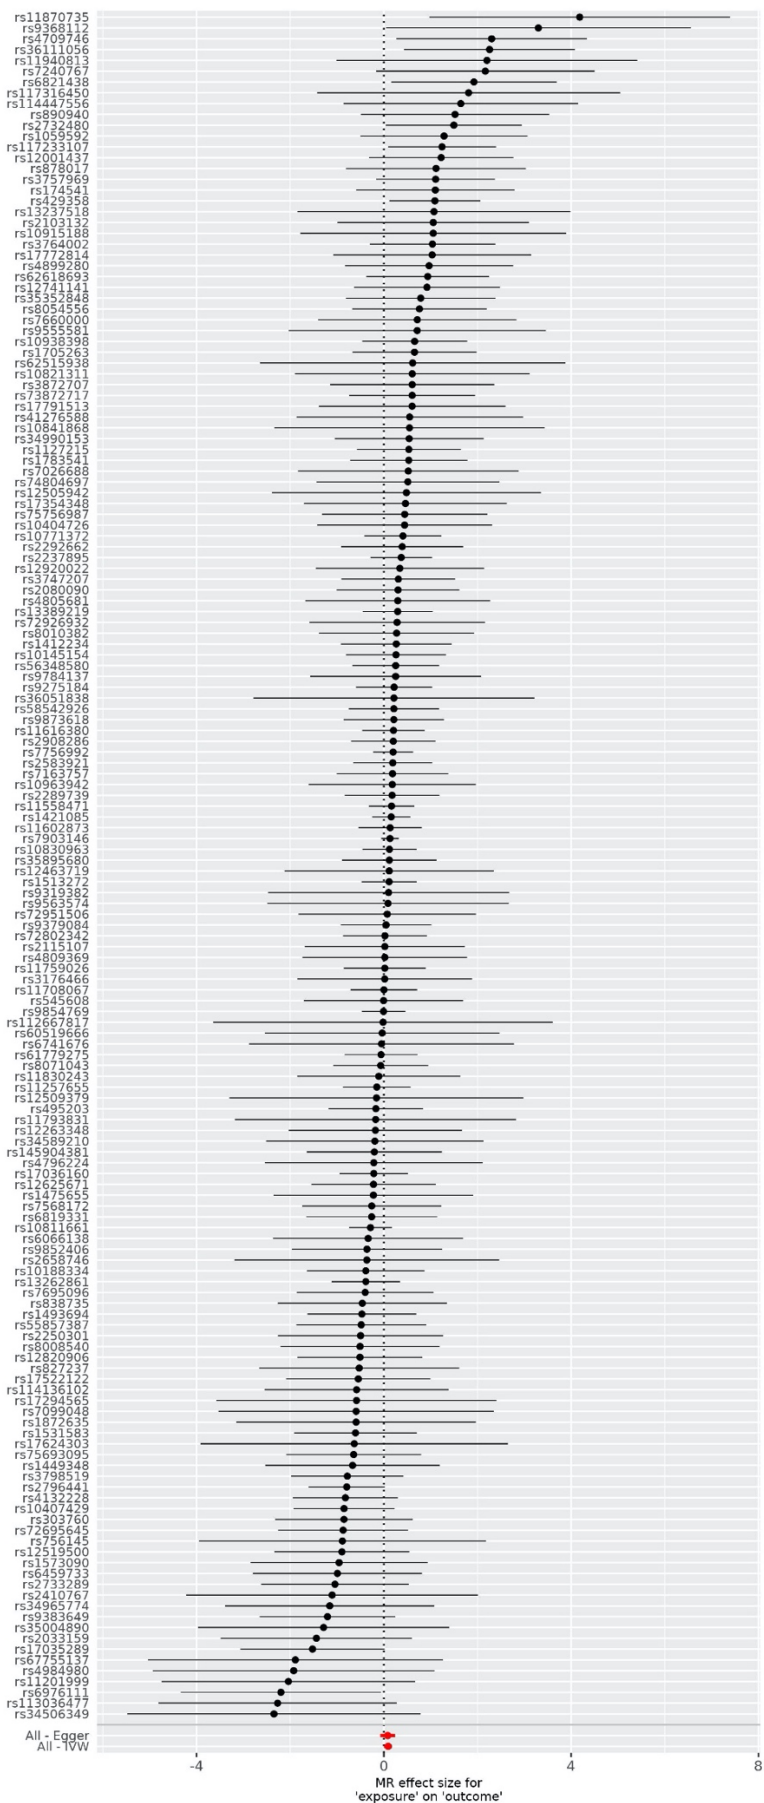



Supplementary Figure 12: Funnel plots showing point estimates as the exposures of interest; Diabetes as exposure. PD risk and progression as outcomes.

### PD risk as outcome

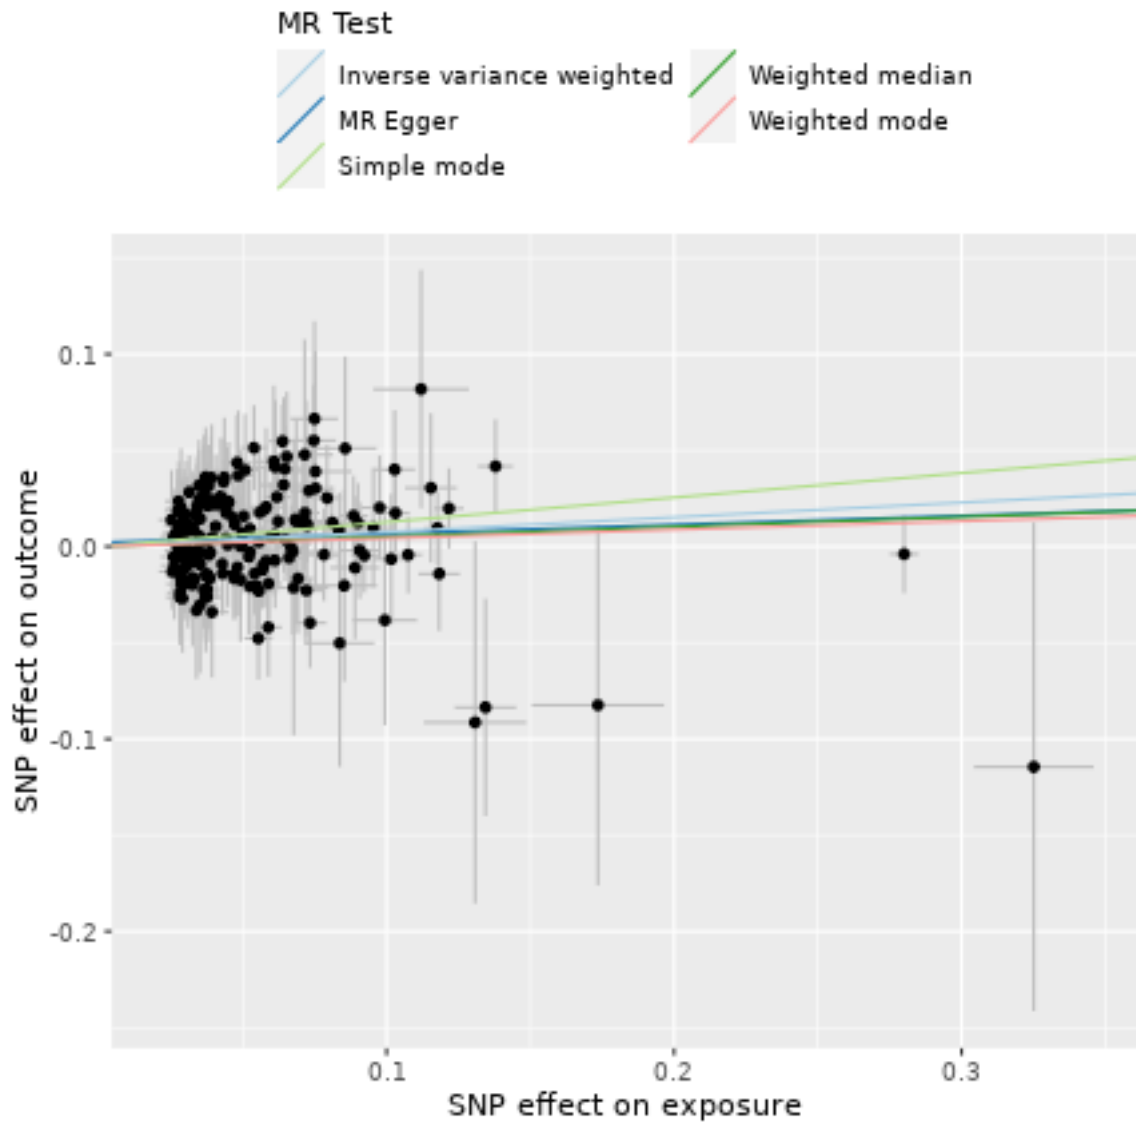

### MMSE in PD as outcome

MR Test

- Inverse variance weighted
- MR Egger
- Simple mode
- Weighted median
- Weighted mode

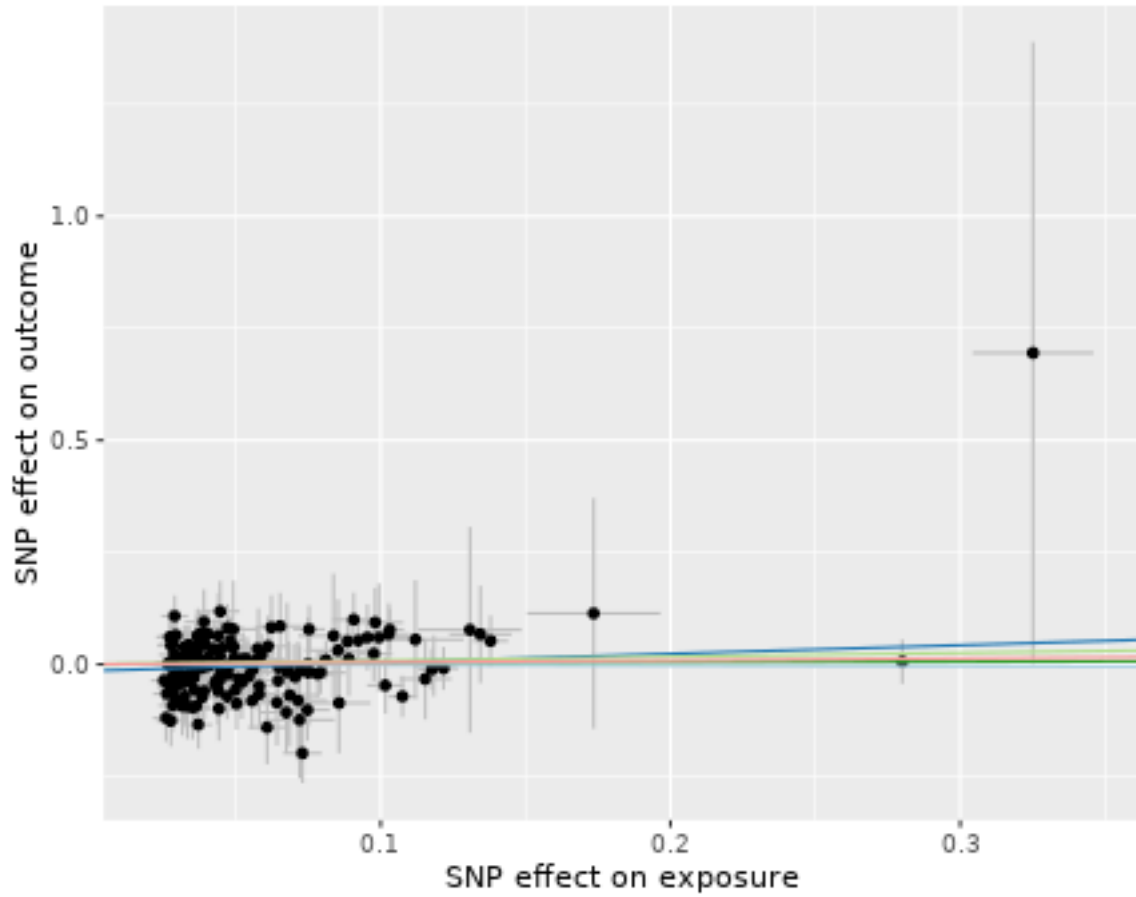

### MoCA in PD as outcome

#### MR Test

- Inverse variance weighted
- MR Egger
- Simple mode
- Weighted median
- Weighted mode

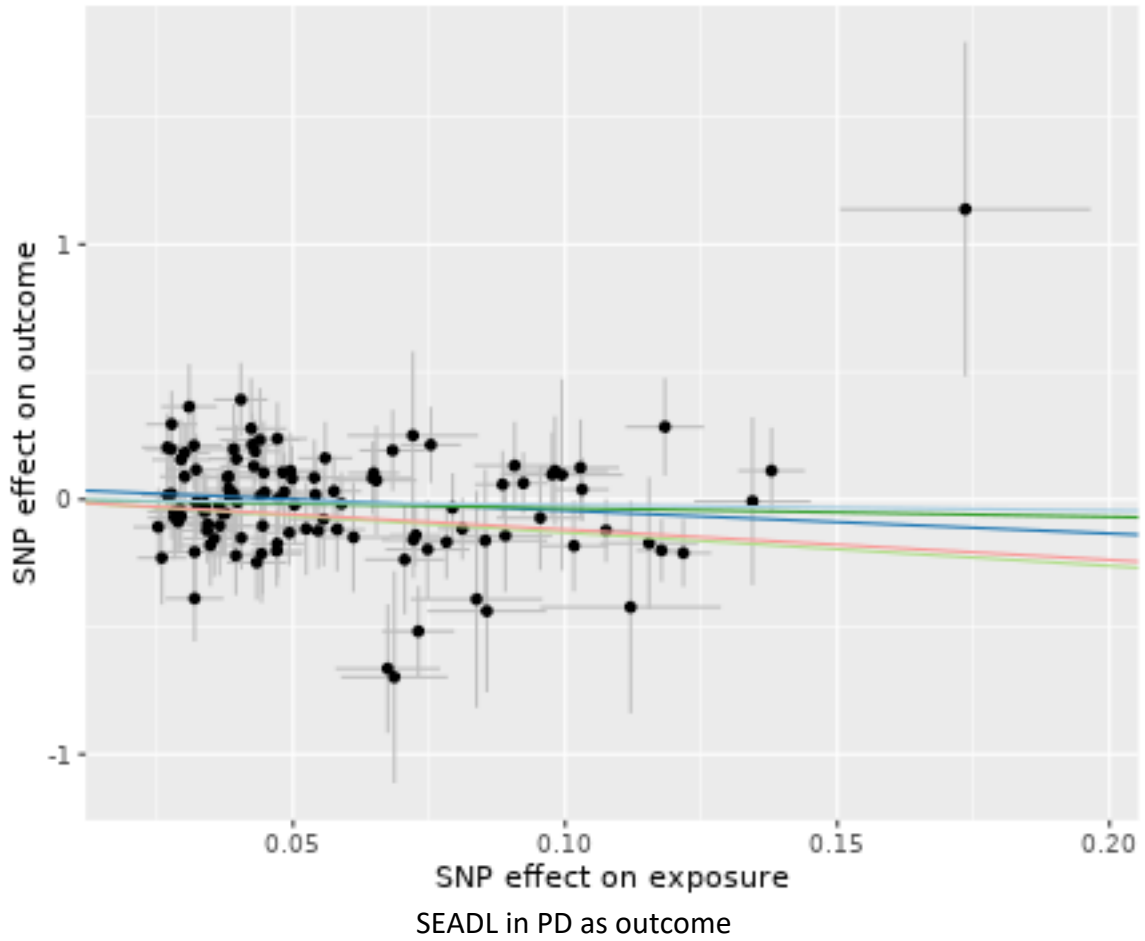

### UPDRS3 in PD as outcome

MR Test

- Inverse variance weighted
- MR Egger
- Simple mode
- Weighted median
- Weighted mode

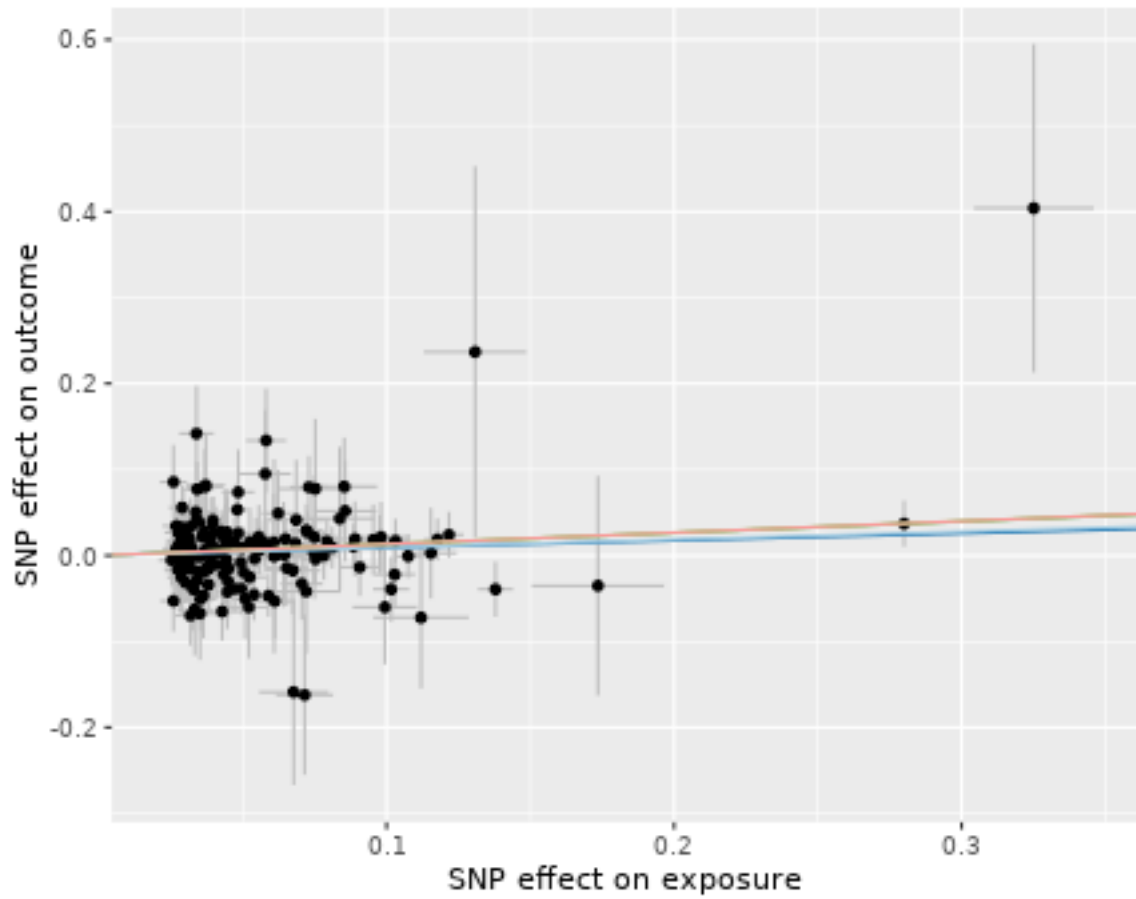

Supplementary Figure 13: Funnel plots evaluated the presence of possible heterogeneity across the estimates. Diabetes as exposure. PD risk and progression as outcomes.

### PD risk as outcome

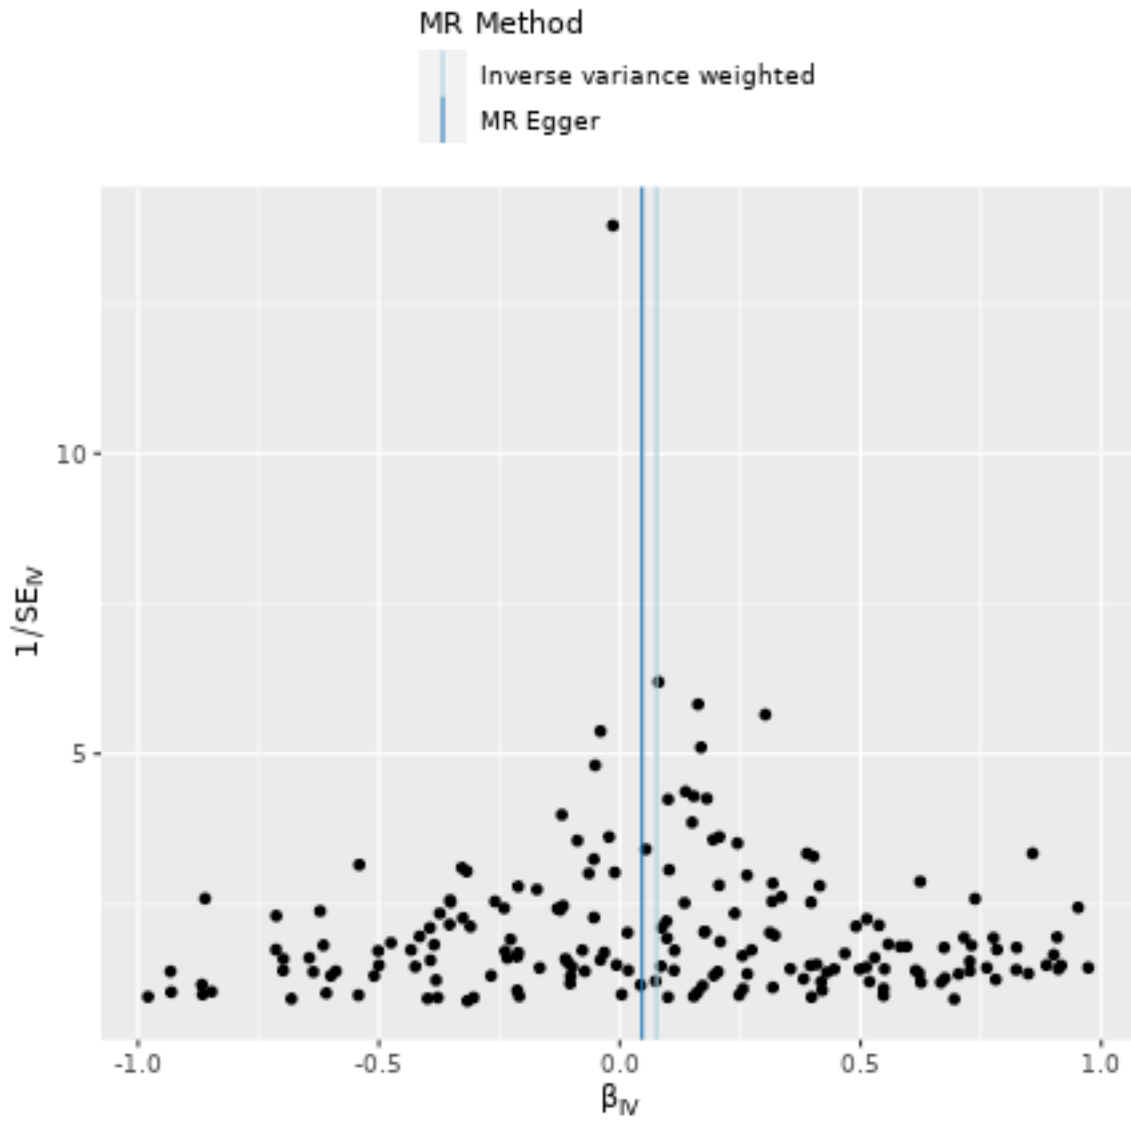

### MMSE in PD as outcome

MR Method

- Inverse variance weighted
- MR Egger

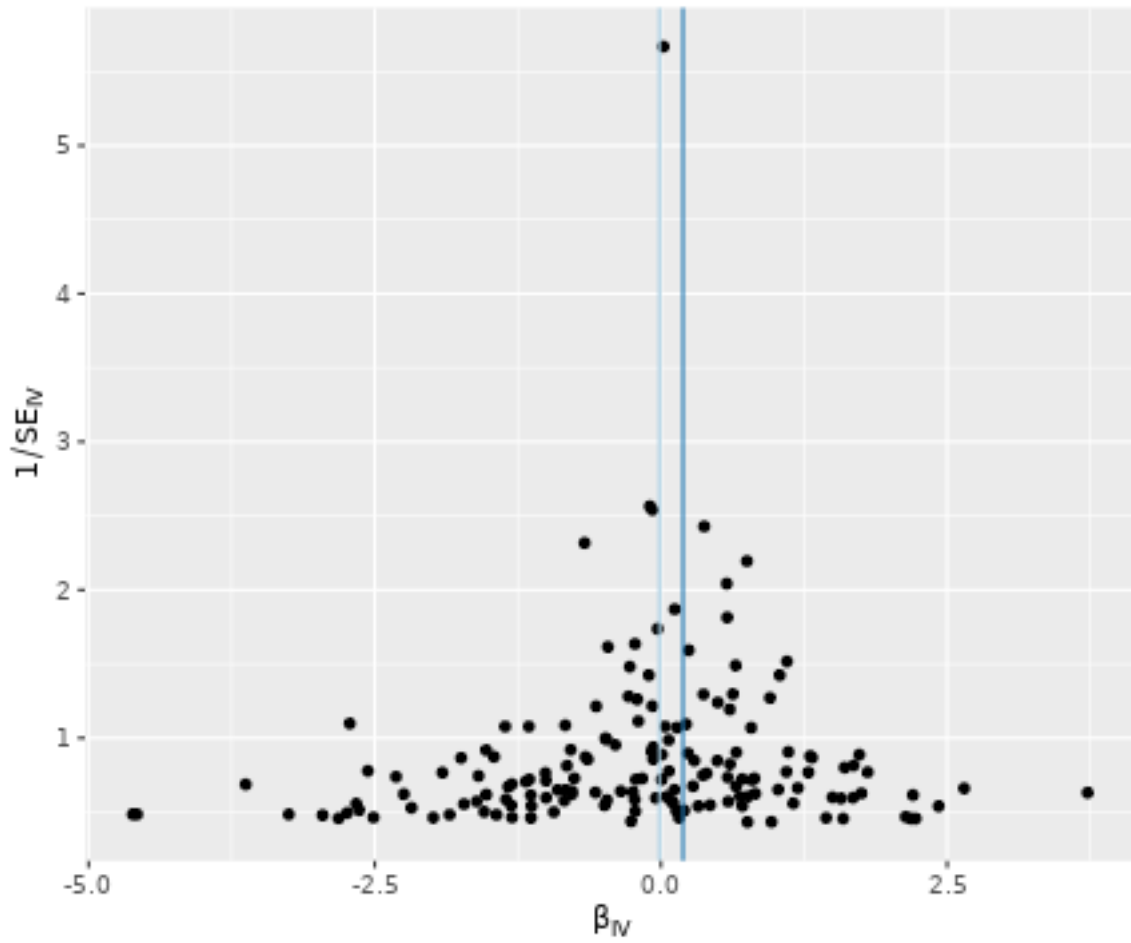

### MoCA in PD as outcome

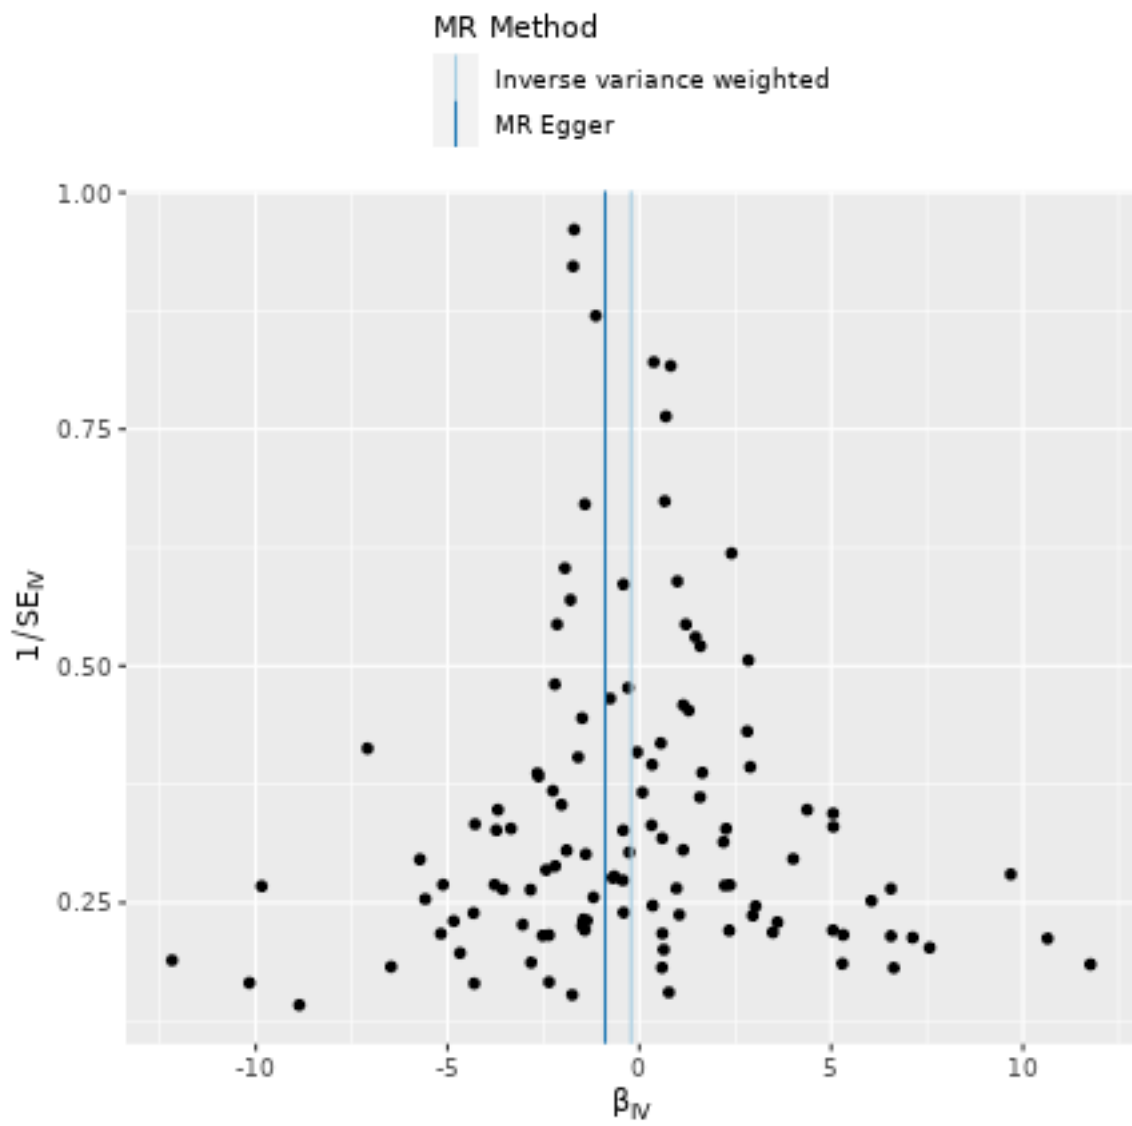

### UPDRS3 in PD as outcome

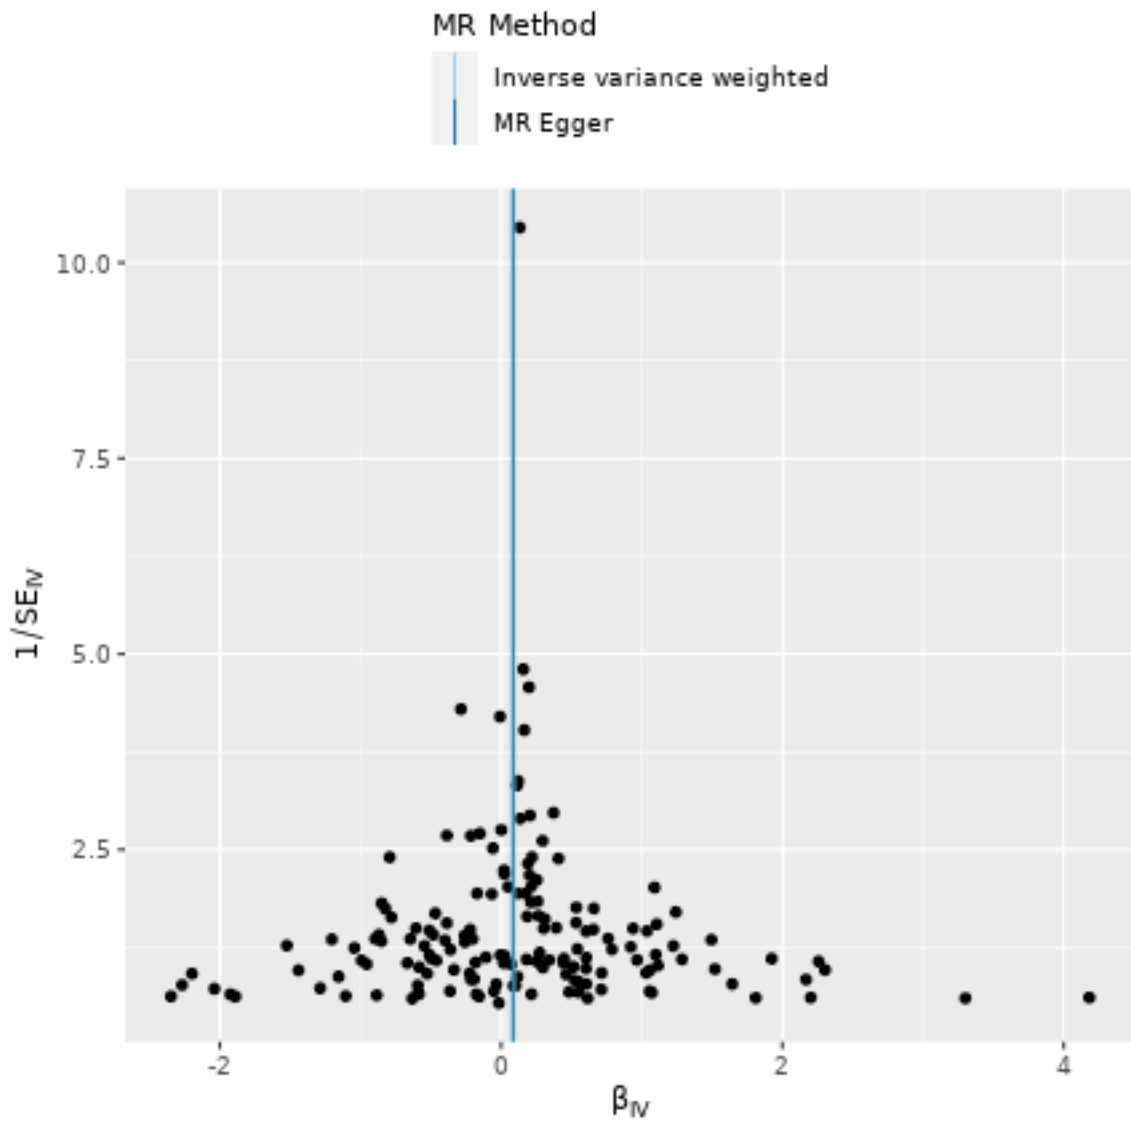

Supplement: NIHMS1794654-supplement-Supplementary_Information.pdf [file NIHMS1794654-supplement-Supplementary_Information.pdf]
